# Supplementary material for: Metal incorporated Horseradish Peroxidase (HRP) catalyzed oxidation of resveratrol: selective dimerization or decomposition
Source: Royal Society of Chemistry journal article supplement (doi:10.1039/c3ra43784a), 2013-01-01

# Biocatalytic Promiscuity of HRP in Resveratrol Oxidation: A Function Guided Design with Metal Binding

Chang Li, Xiaofei Xu, Jing Lu, Lin Wang and Yuanjiang Pan\*

Department of Chemistry, Zhejiang University, Hangzhou 310027, China

[panyuanjiang@zju.edu.cn](mailto:panyuanjiang@zju.edu.cn)

## *Supporting information*

| <b>Table of contents</b>                                                                           | <b>Page</b> |
|----------------------------------------------------------------------------------------------------|-------------|
| I. HPLC yields of the products in HRP catalyzed resveratrol oxidation.                             | 2           |
| II. UV spectra of synthesized resveratrol dimers <b>2</b> , <b>3&amp;4</b> and <b>5</b> .          | 3           |
| III. Characterization of HRP-metal complex's conformation with circular dichroism spectrometer.    | 4           |
| IV. Determination of the HRP-metal complex constitution with Atomic Absorption Spectrometer (AAS). | 5           |
| V. NMR Spectra of Synthesized Compounds                                                            | 6           |
| NMR Spectra of <b>2</b> (1H, 13C and DEPT-135)                                                     | 7-9         |
| NMR Spectra of <b>3&amp;4</b> (1H, 13C and DEPT-135)                                               | 10-12       |
| NMR Spectra of <b>5</b> (1H, 13C and DEPT-135)                                                     | 13-15       |
| NMR Spectra of <b>6</b> (1H and 13C)                                                               | 16-17       |
| NMR Spectra of <b>7</b> (1H and 13C)                                                               | 18-19       |

### I. HPLC yields of the products in HRP catalyzed resveratrol oxidation.

| Enzyme used          | conversion of <b>1</b> (%) | Yield of <b>2</b> (%)     | Yield of <b>3&amp;4</b> (%) | Yield of <b>5</b> (%) | Yield of <b>6</b> (%) | Yield of <b>7</b> (%) |
|----------------------|----------------------------|---------------------------|-----------------------------|-----------------------|-----------------------|-----------------------|
| native HRP           | 95.9                       | 52.5                      | 35.7                        | 7.7                   | -                     | -                     |
| HRP-Zn <sup>2+</sup> | 96.7                       | 67.6                      | 23.1                        | 6.1                   | -                     | -                     |
| HRP-Ni <sup>2+</sup> | 96.3                       | 61.7                      | 27.4                        | 7.2                   | -                     | -                     |
| HRP-Co <sup>2+</sup> | 94.1                       | 51.2                      | 34.2                        | 8.8                   | -                     | -                     |
| HRP-Ca <sup>2+</sup> | 57.1                       | 34.0                      | 19.8                        | 3.3                   | -                     | -                     |
| HRP-Cu <sup>2+</sup> | >99                        | -                         | -                           | -                     | 70.5 <sup>a</sup>     | 48.2 <sup>a</sup>     |
| HRP-Fe <sup>2+</sup> | >99                        | -                         | -                           | -                     | 74.2 <sup>a</sup>     | 51.6 <sup>a</sup>     |
| HRP-Mn <sup>2+</sup> | >99                        | 94.0 (91.2 <sup>a</sup> ) | -                           | -                     | -                     | -                     |

**Table S1.** HPLC yields of the products in HRP catalyzed resveratrol oxidation

<sup>a</sup> isolated yields.

## II. UV spectra of synthesized resveratrol dimers 2, 3&4 and 5.

**1, 2, 3&4,** and **5** were prepared as 0.001 M acetone solution, and their spectra were recorded using a Shimadzu. Spectra were recorded in the range of 200 - 400 nm. The spectra were shown in Figure S1.

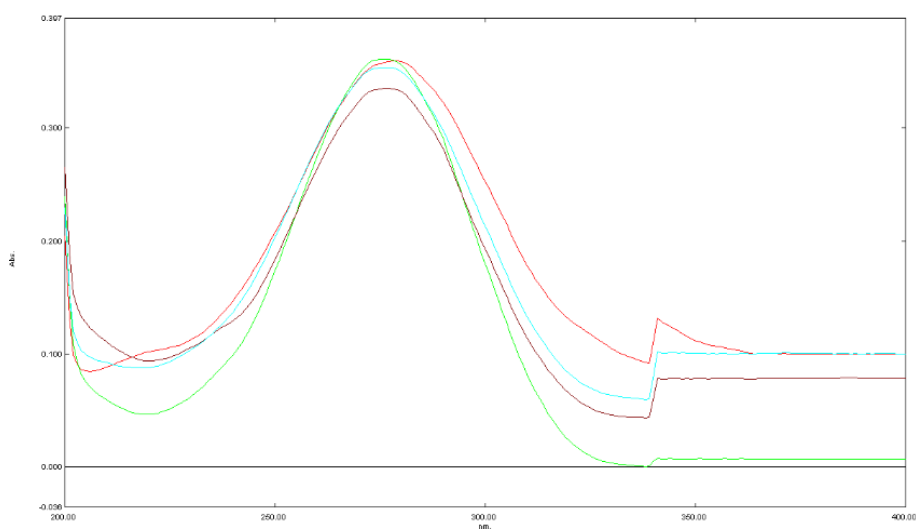

**Figure S1.** UV spectra of **1, 2, 3&4** and **5** (0.001 M acetone solution)

### III. Characterization of HRP-metal complex's conformation with circular dichroism spectrometer.

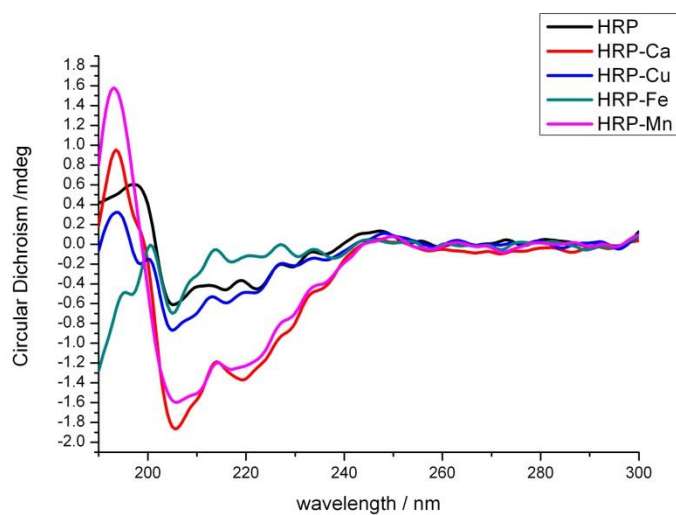

**Figure S2.** CD spectra of native HRP, [HRP-Ca], [HRP-Mn], [HRP-Fe] and [HRP-Cu]

| enzyme/complex | $\alpha$ -helix | $\beta$ -sheet | $\beta$ -turn | random |
|----------------|-----------------|----------------|---------------|--------|
| native HRP     | 0.0             | 82.8           | 0.0           | 17.2   |
| [HRP-Ca]       | 0.0             | 82.0           | 0.0           | 18.0   |
| [HRP-Cu]       | 0.0             | 82.5           | 0.0           | 17.5   |
| [HRP-Fe]       | 0.0             | 82.7           | 0.0           | 17.3   |
| [HRP-Mn]       | 0.0             | 82.1           | 0.0           | 17.9   |

**Table S2.** Prediction of secondary structure constitution by Yang's method

### III. Determination of the HRP-metal complex constitution with Atomic

#### Absorption Spectrometer (AAS)

| Sample     | Concentration of Fe (ppm) | Concentration of binded metal (ppm) | Number of binded metal |
|------------|---------------------------|-------------------------------------|------------------------|
| Native HRP | 13.5564                   | -                                   | -                      |
| HRP-Cu     | 13.5782                   | 83.1007                             | 6.12                   |
| HRP-Fe     | 52.4633                   | 52.4633                             | 2.87                   |
| HRP-Mn     | 13.5773                   | 150.5723                            | 11.09                  |

**Table S3.** AAS suggested concentration of Fe and binded metals in 2 mg/mL native HRP, [HRP-Cu], [HRP-Fe] and [HRP-Mn]

### III. NMR Spectra of Synthesized Compounds

|                                                      |       |
|------------------------------------------------------|-------|
| NMR Spectra of <b>2</b> (1H, 13C and DEPT-135)       | 7-9   |
| NMR Spectra of <b>3&amp;4</b> (1H, 13C and DEPT-135) | 10-12 |
| NMR Spectra of <b>5</b> (1H, 13C and DEPT-135)       | 13-15 |
| NMR Spectra of <b>6</b> (1H and 13C)                 | 16-17 |
| NMR Spectra of <b>7</b> (1H and 13C)                 | 18-19 |

—8.48  
~8.24  
~8.20

7.44  
7.44  
7.43  
—7.24  
—7.05  
6.88  
6.85  
6.55  
6.29  
6.29  
6.27  
6.20  
6.20

5.46  
5.45

4.48  
4.47

7

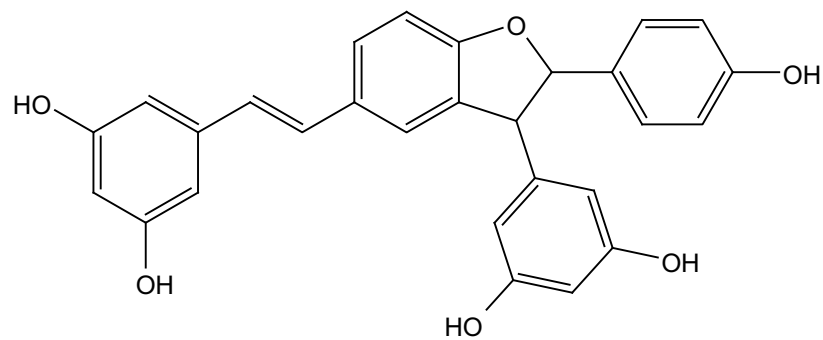

**2: *trans*- $\delta$ -viniferin**

proton spectrum in acetone, 500MHz

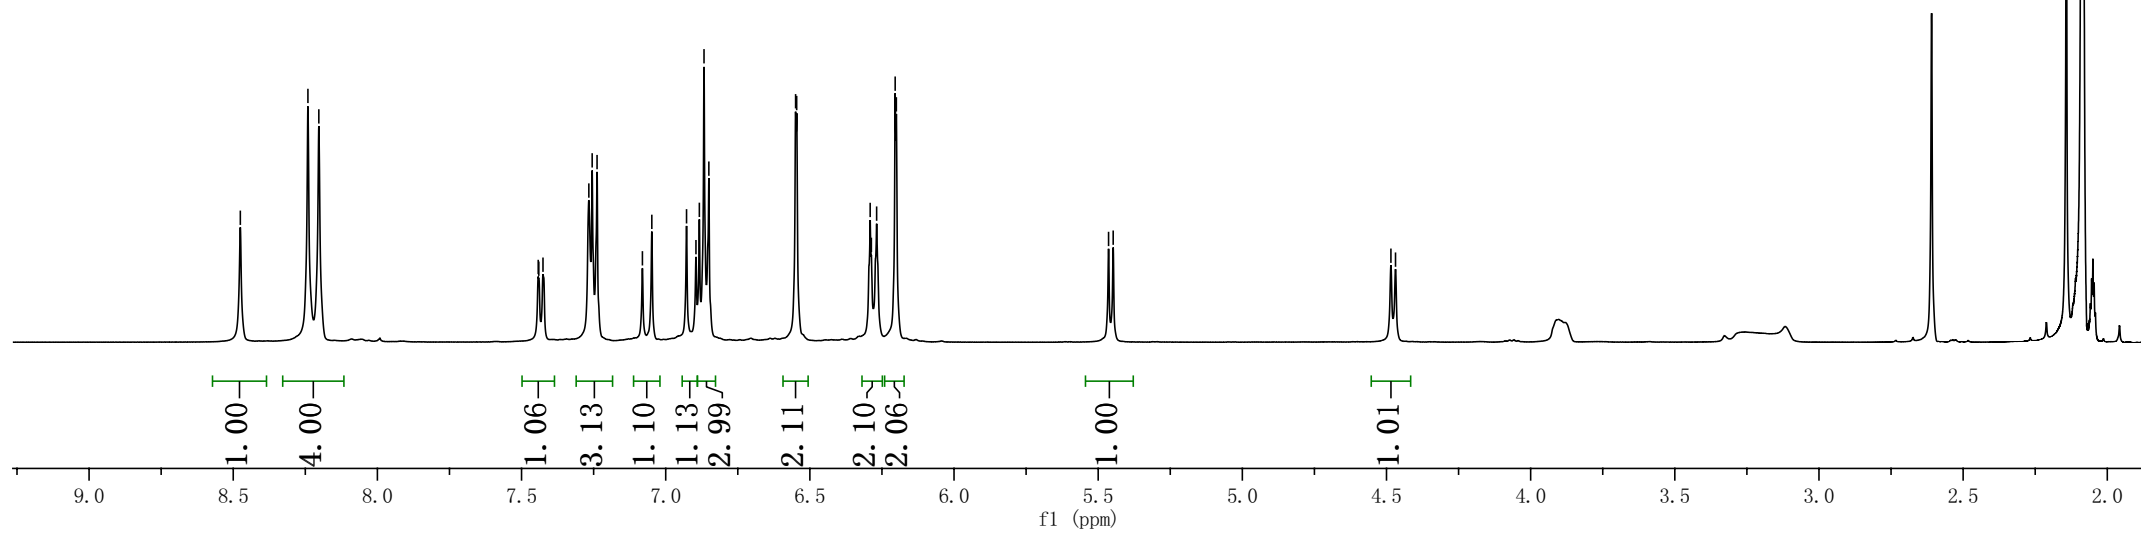

160.58  
159.72  
159.51  
158.38  
—145.21  
—140.77  
132.12  
131.70  
—127.18  
—123.91  
—116.16  
—110.14  
—105.72  
102.71  
102.37  
—94.02

—57.79  
—55.40

8



**2: *trans*- $\delta$ -viniferin**

carbon spectrum in acetone, 125MHz

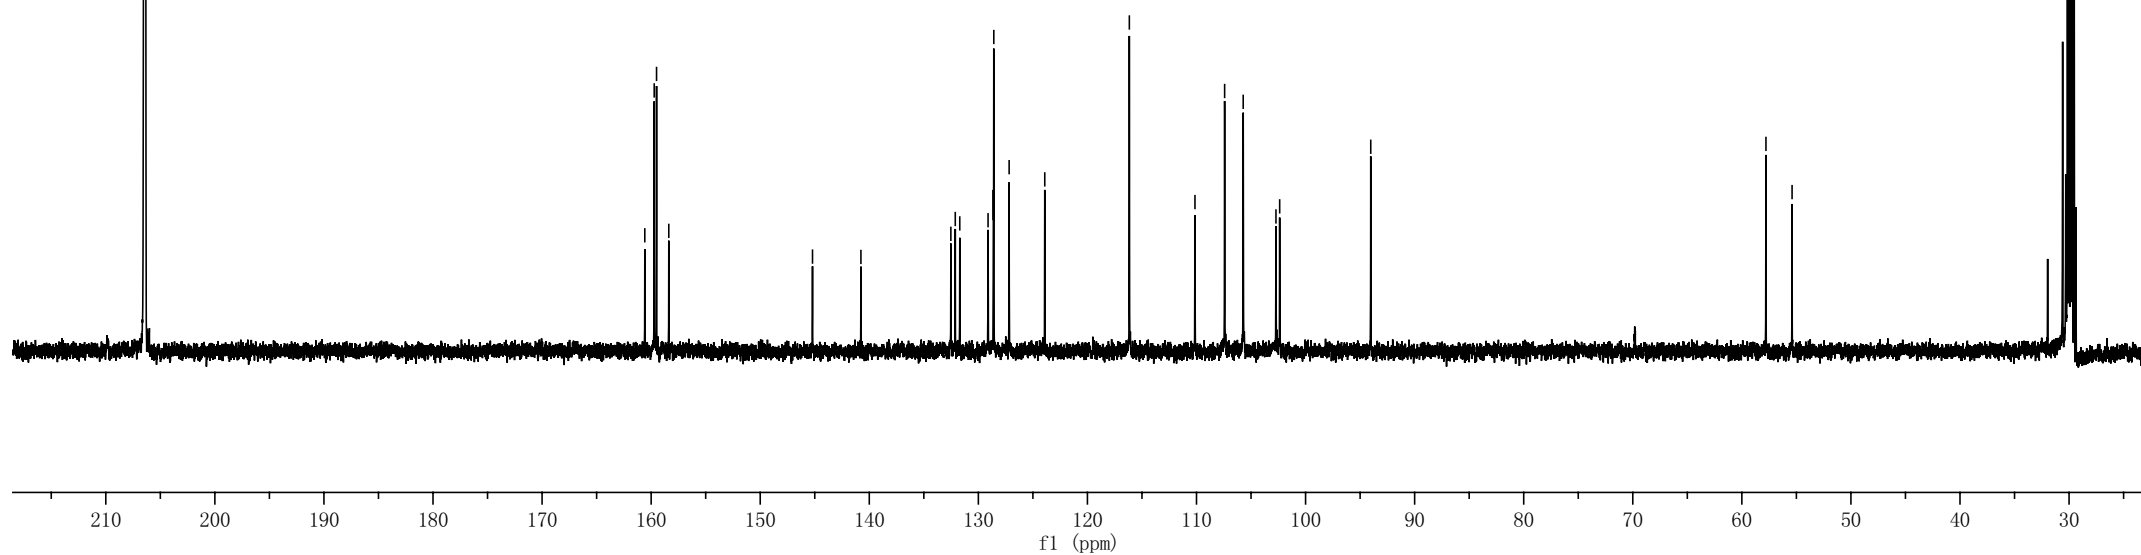



129.11  
128.58  
127.17  
123.91

116.15

110.14  
107.42  
105.71  
102.71  
102.37

94.02

57.78



**2: *trans*- $\delta$ -viniferin**

DEPT-135 spectrum in acetone, 125MHz

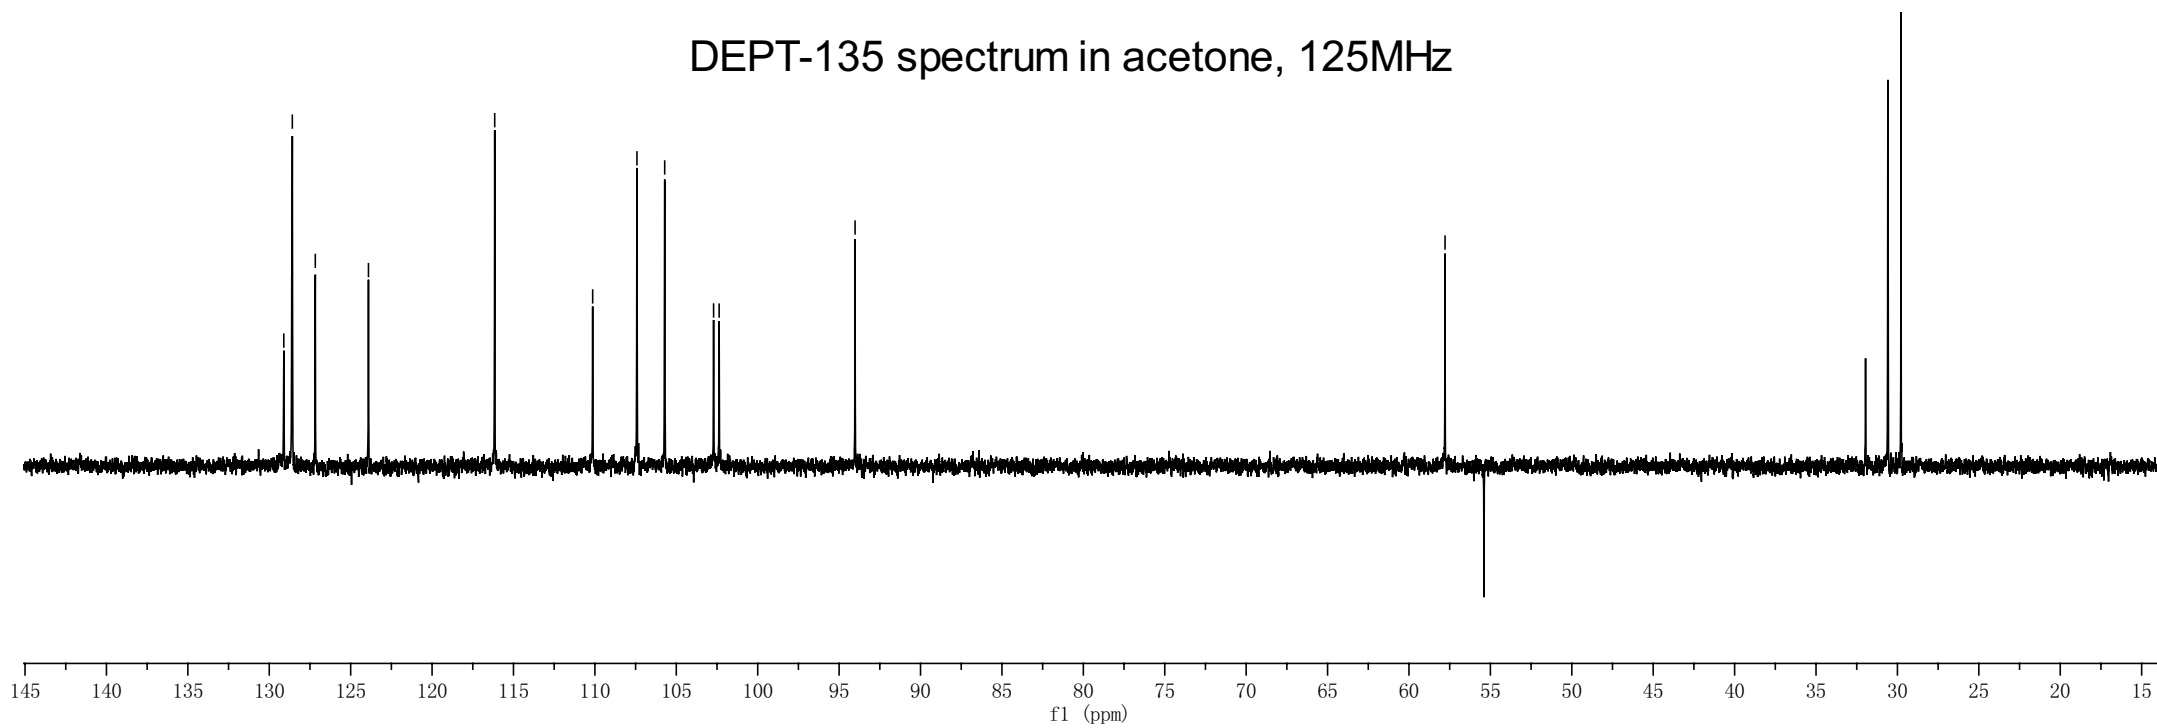

—8.10

7.47  
7.44

7.08  
7.06  
6.86  
6.84

6.67  
6.58  
6.58  
6.31  
6.30  
6.16  
6.12

5.92  
5.92  
5.75  
5.74

4.48  
4.47

4.26  
4.22

4.14  
4.14

4.08  
4.07  
3.48

3.41  
3.40

3.39  
3.38  
3.37

3.36  
3.36

2.95  
2.94  
2.94

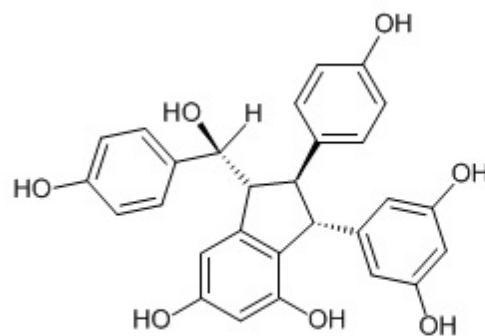

3: leachianols F

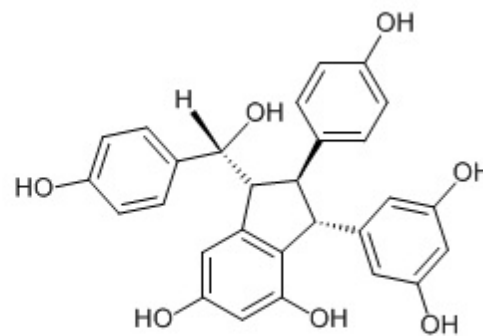

4: leachianols G

mixture of 3 and 4 (1:2)

proton spectrum in acetone, 500MHz

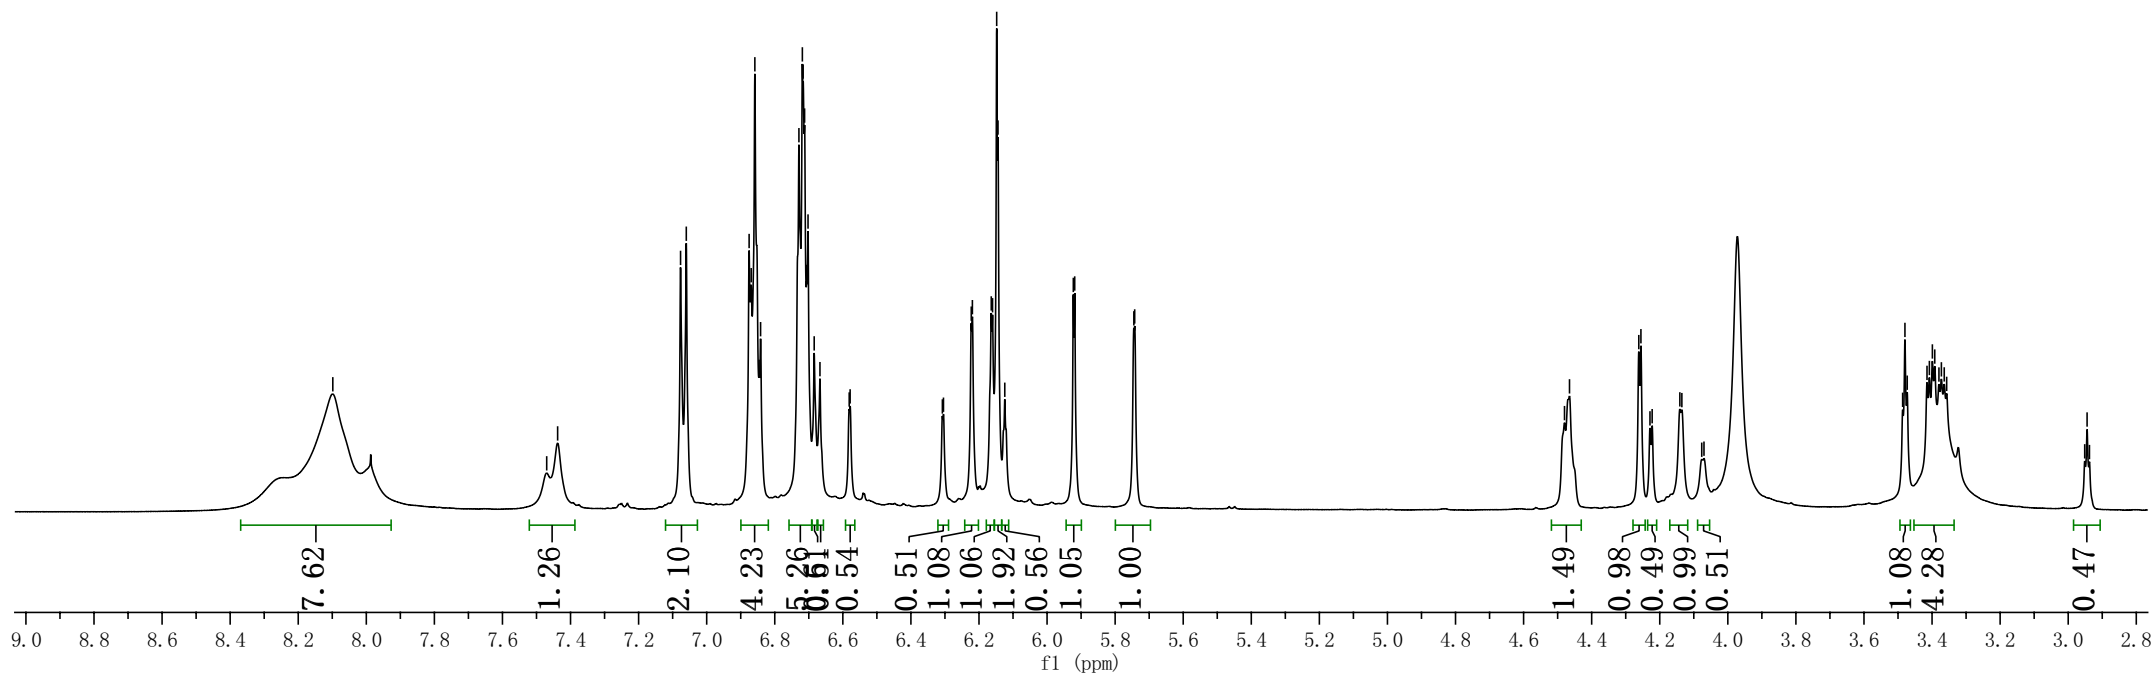

159.20  
159.12  
158.49  
157.24  
156.18  
154.85  
151.43  
147.27

137.97  
135.67  
129.43  
129.29  
129.26  
128.81  
123.09  
115.63  
115.59  
115.40  
115.25  
106.19  
106.01  
105.60  
102.36  
101.05

77.29  
69.85  
62.54  
58.97  
55.95  
55.35  
11

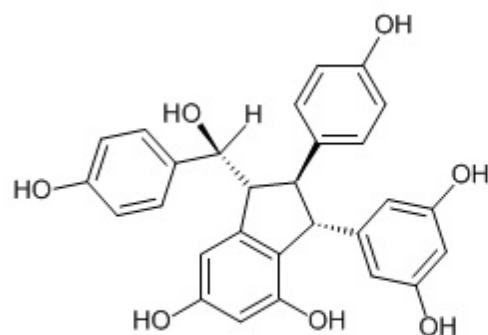

3: leachianols F

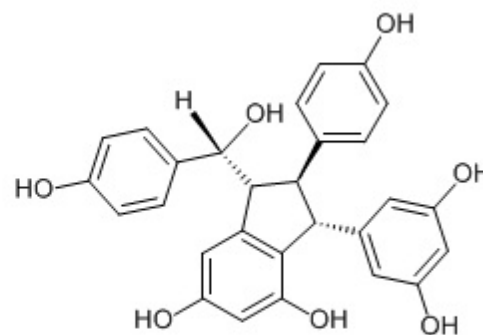

4: leachianols G

mixture of 3 and 4 (1:2)  
carbon spectrum in acetone, 125 MHz

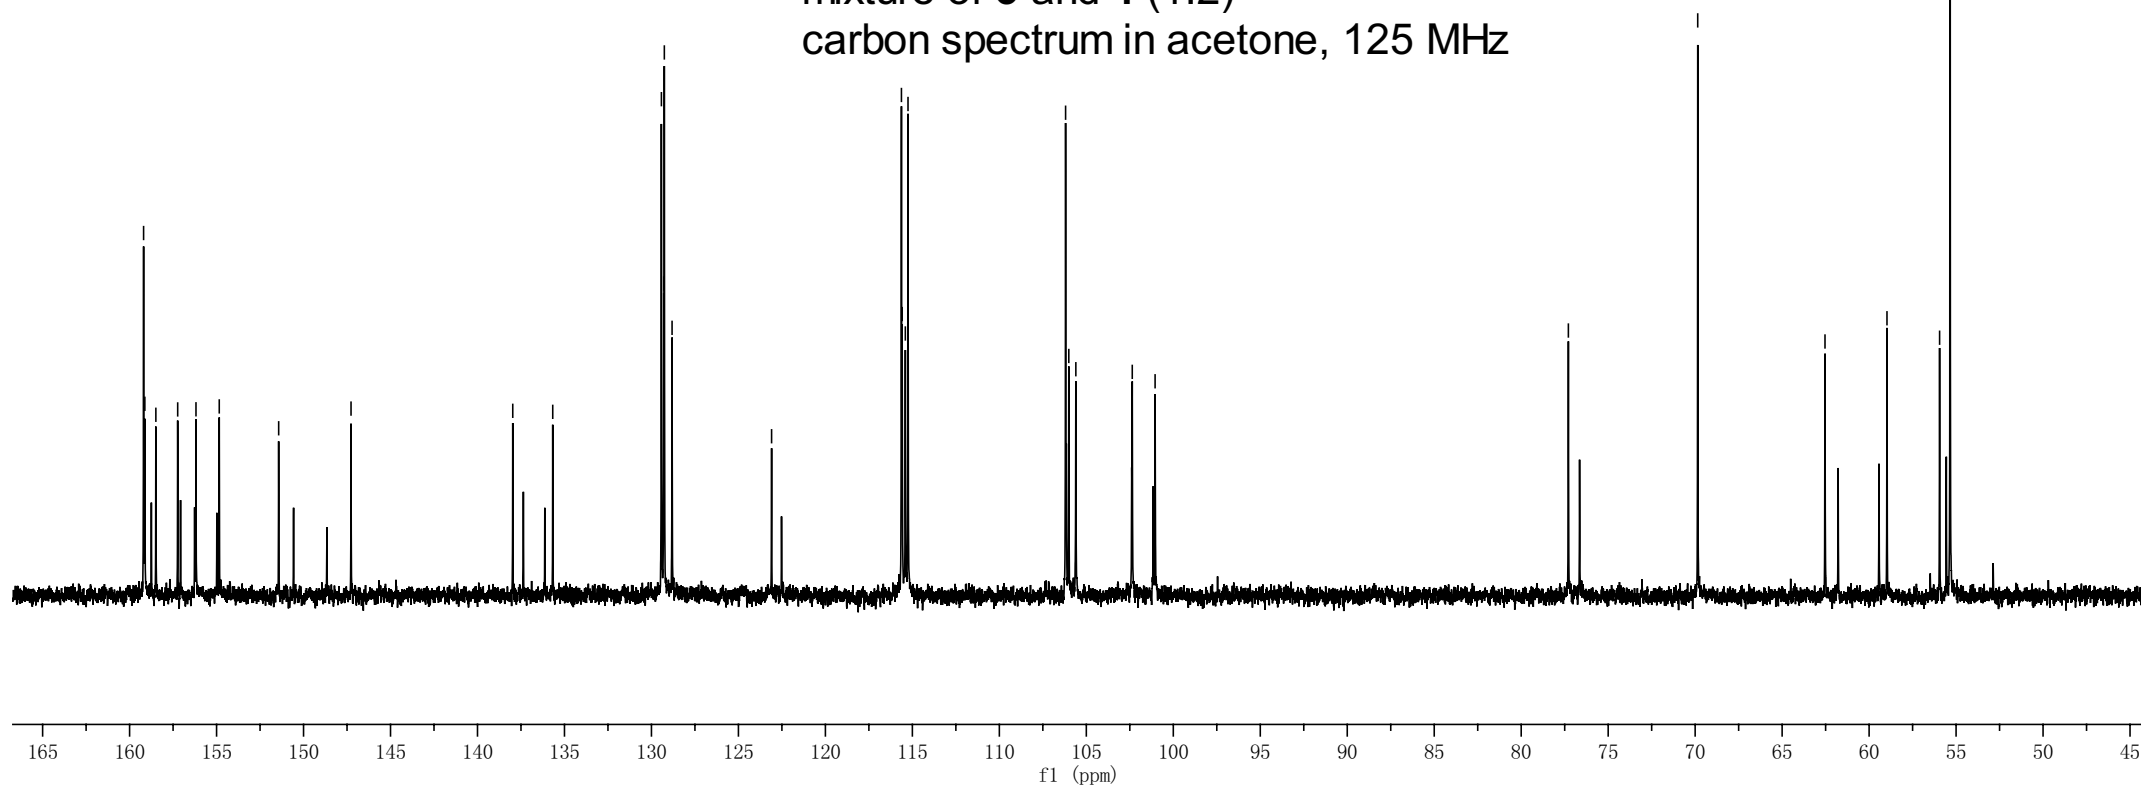

128.66  
128.53  
128.49  
128.05

114.86  
114.82  
114.64  
114.49

105.42  
105.24  
104.84

101.59  
100.38  
100.28

76.53  
75.88

61.78  
61.02

58.21

55.18  
54.78

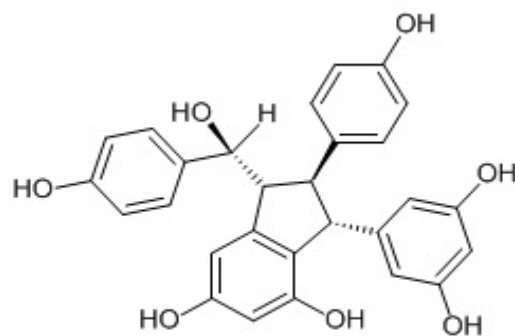

3: leachianols F

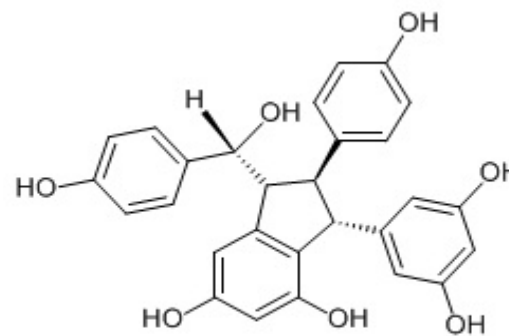

4: leachianols G

mixture of **3** and **4** (1:2)

DEPT-135 spectrum in acetone, 125 MHz

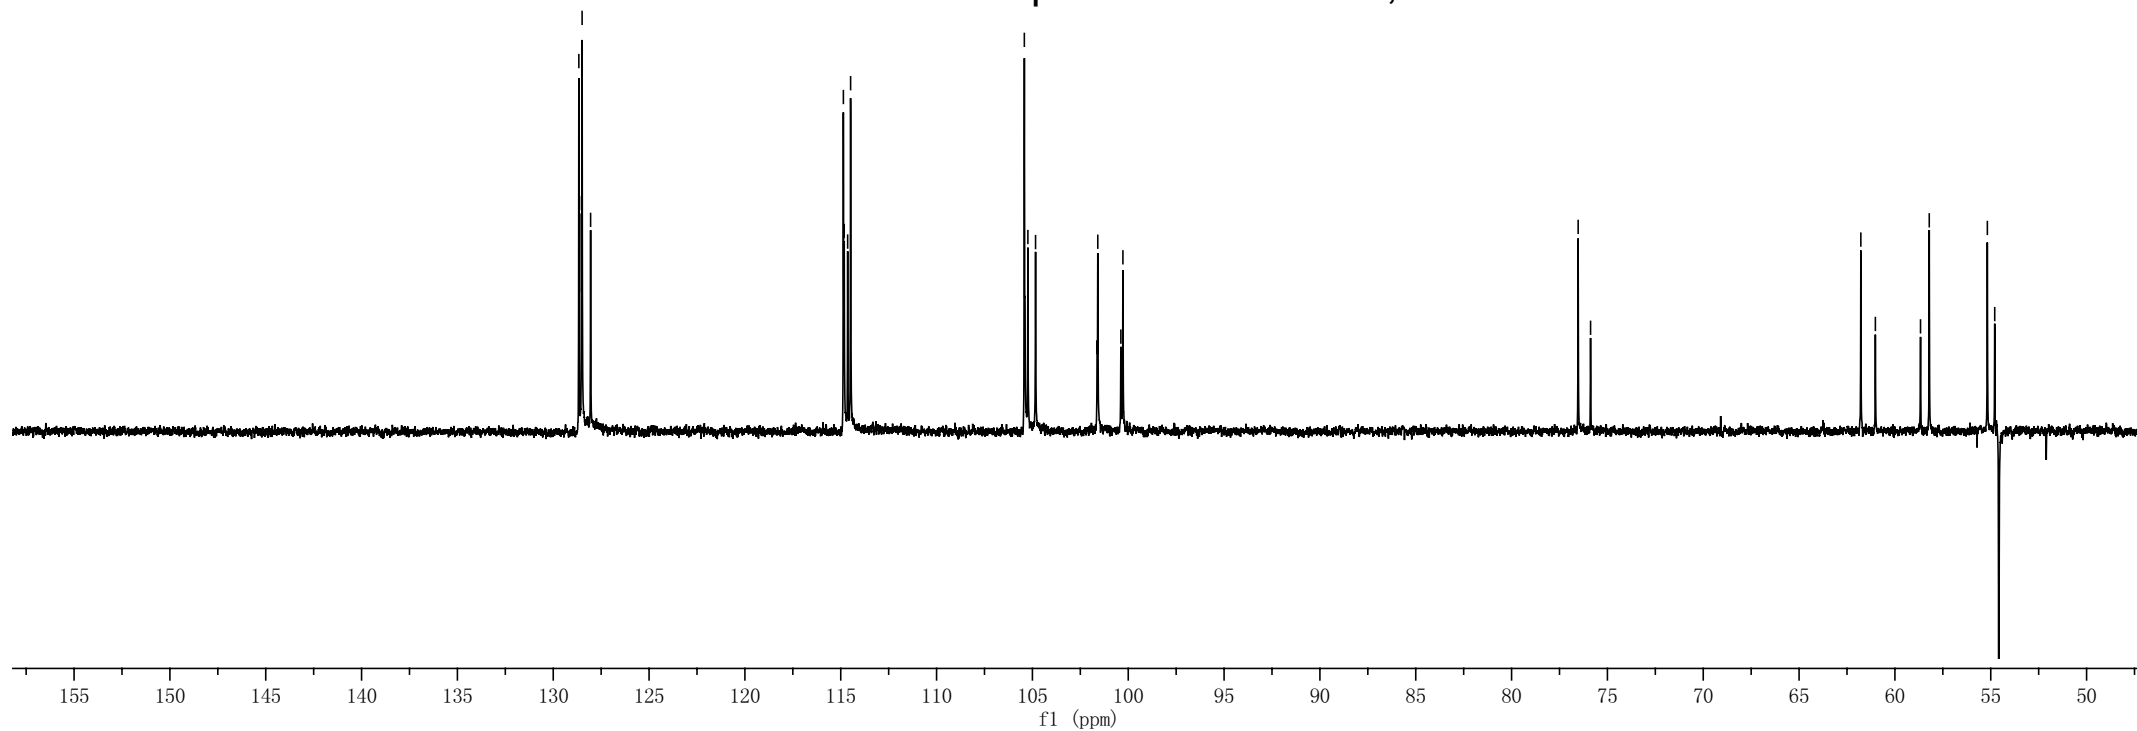

8.19  
8.15  
7.92

7.06  
7.04  
6.78  
6.76  
6.70

6.26  
6.26

4.63

3.88

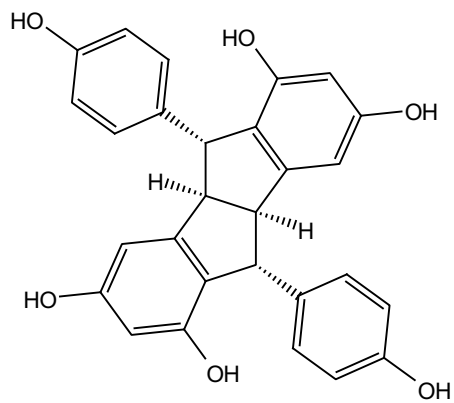

**5 pallidol**  
proton spectrum in Acetone, 500 MHz

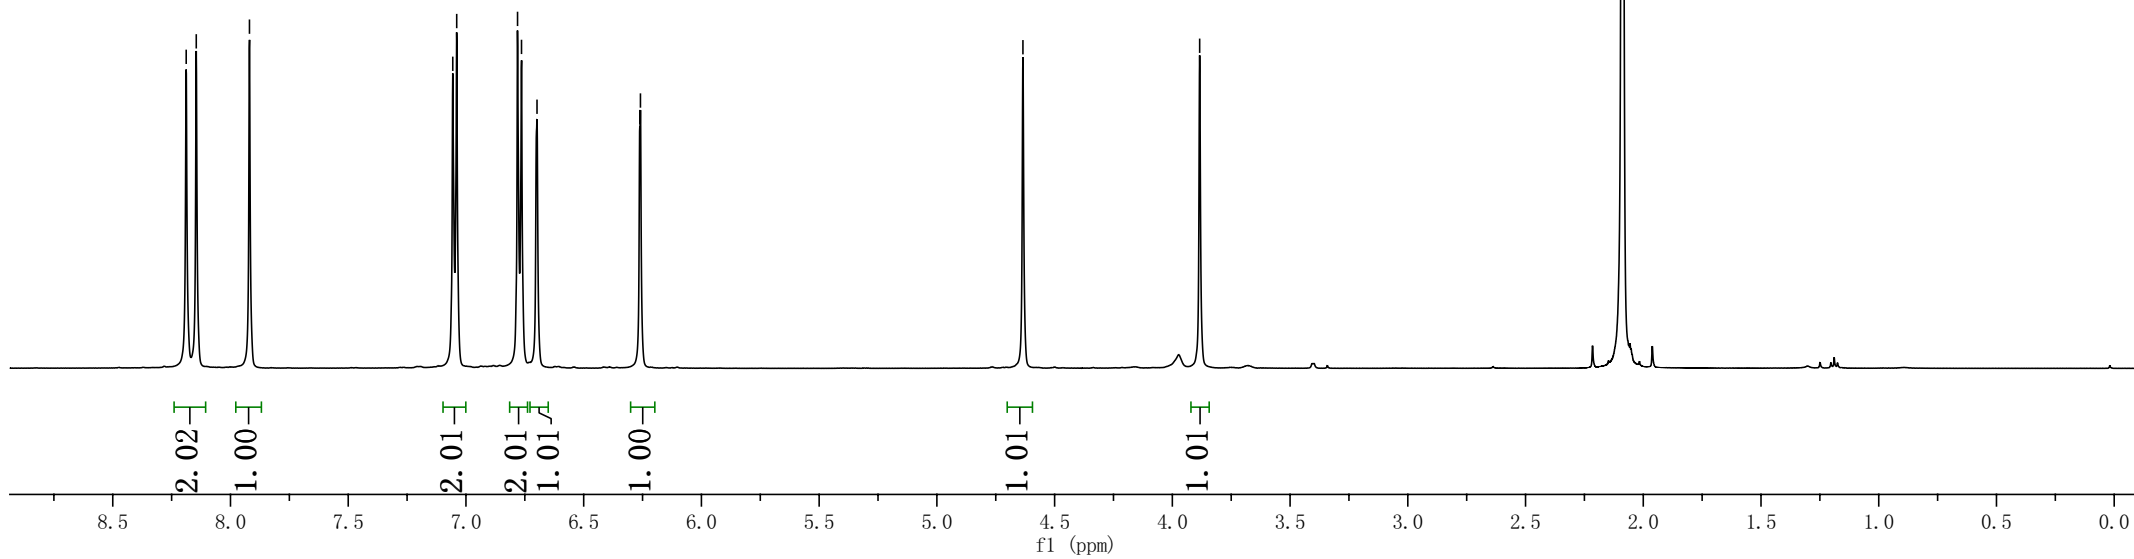

—159.1  
—155.1  
—150.2  
  
—137.6  
—129.0  
—123.2  
—115.8  
  
~103.3  
~102.4  
  
—60.3  
—53.8

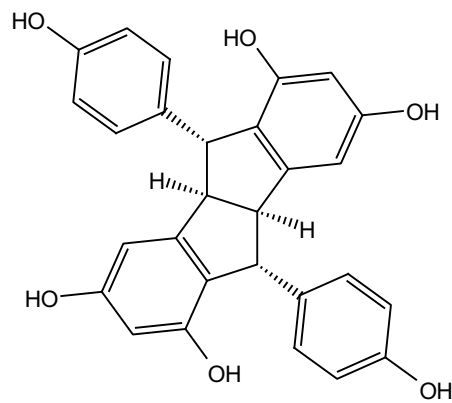

**5 pallidol**  
carbon spectrum in Acetone, 125 MHz

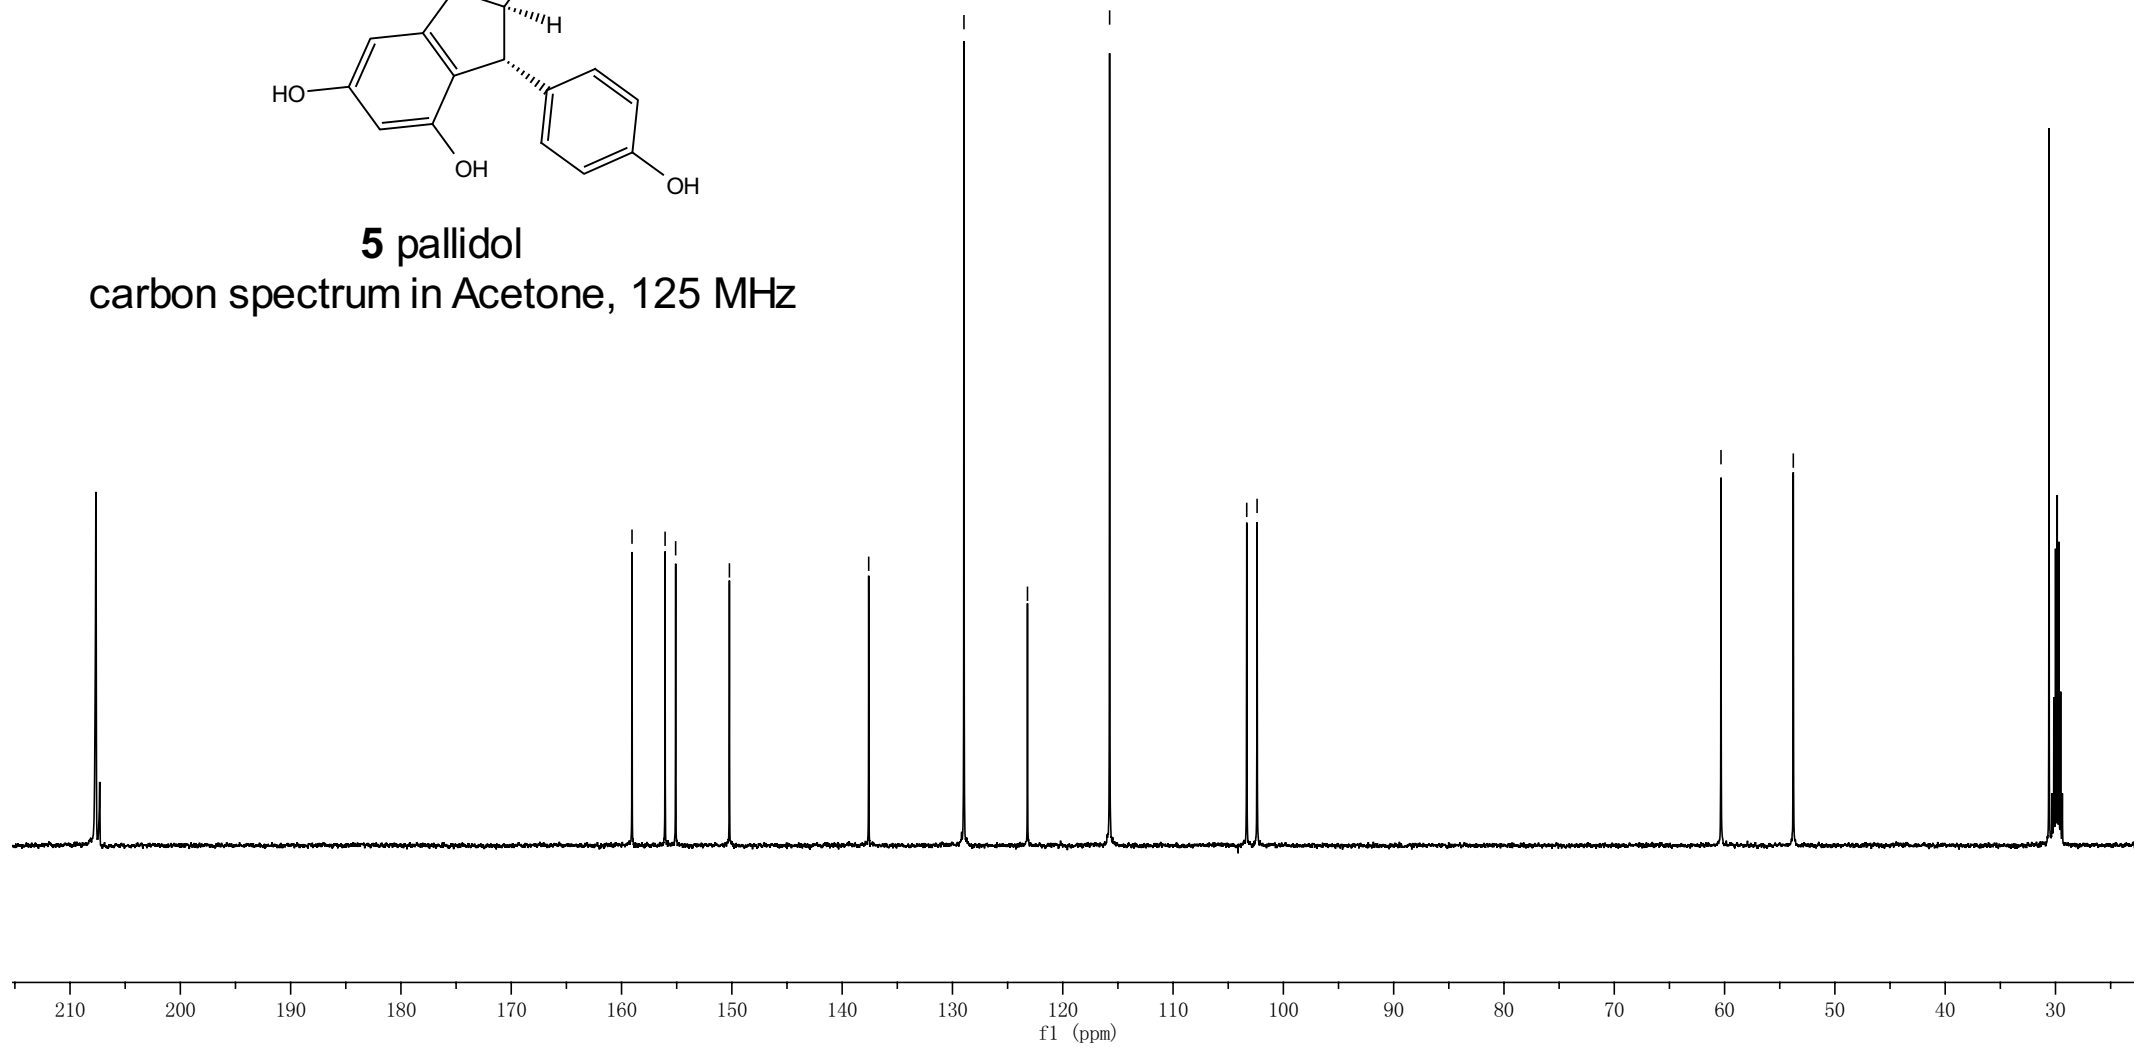

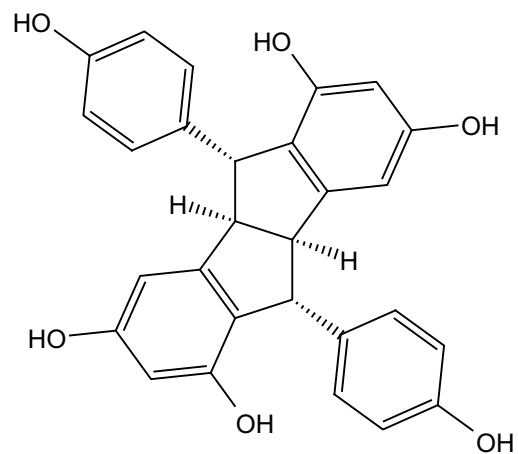

**5 pallidol**  
DEPT-135 spectrum in Acetone,  
125 MHz

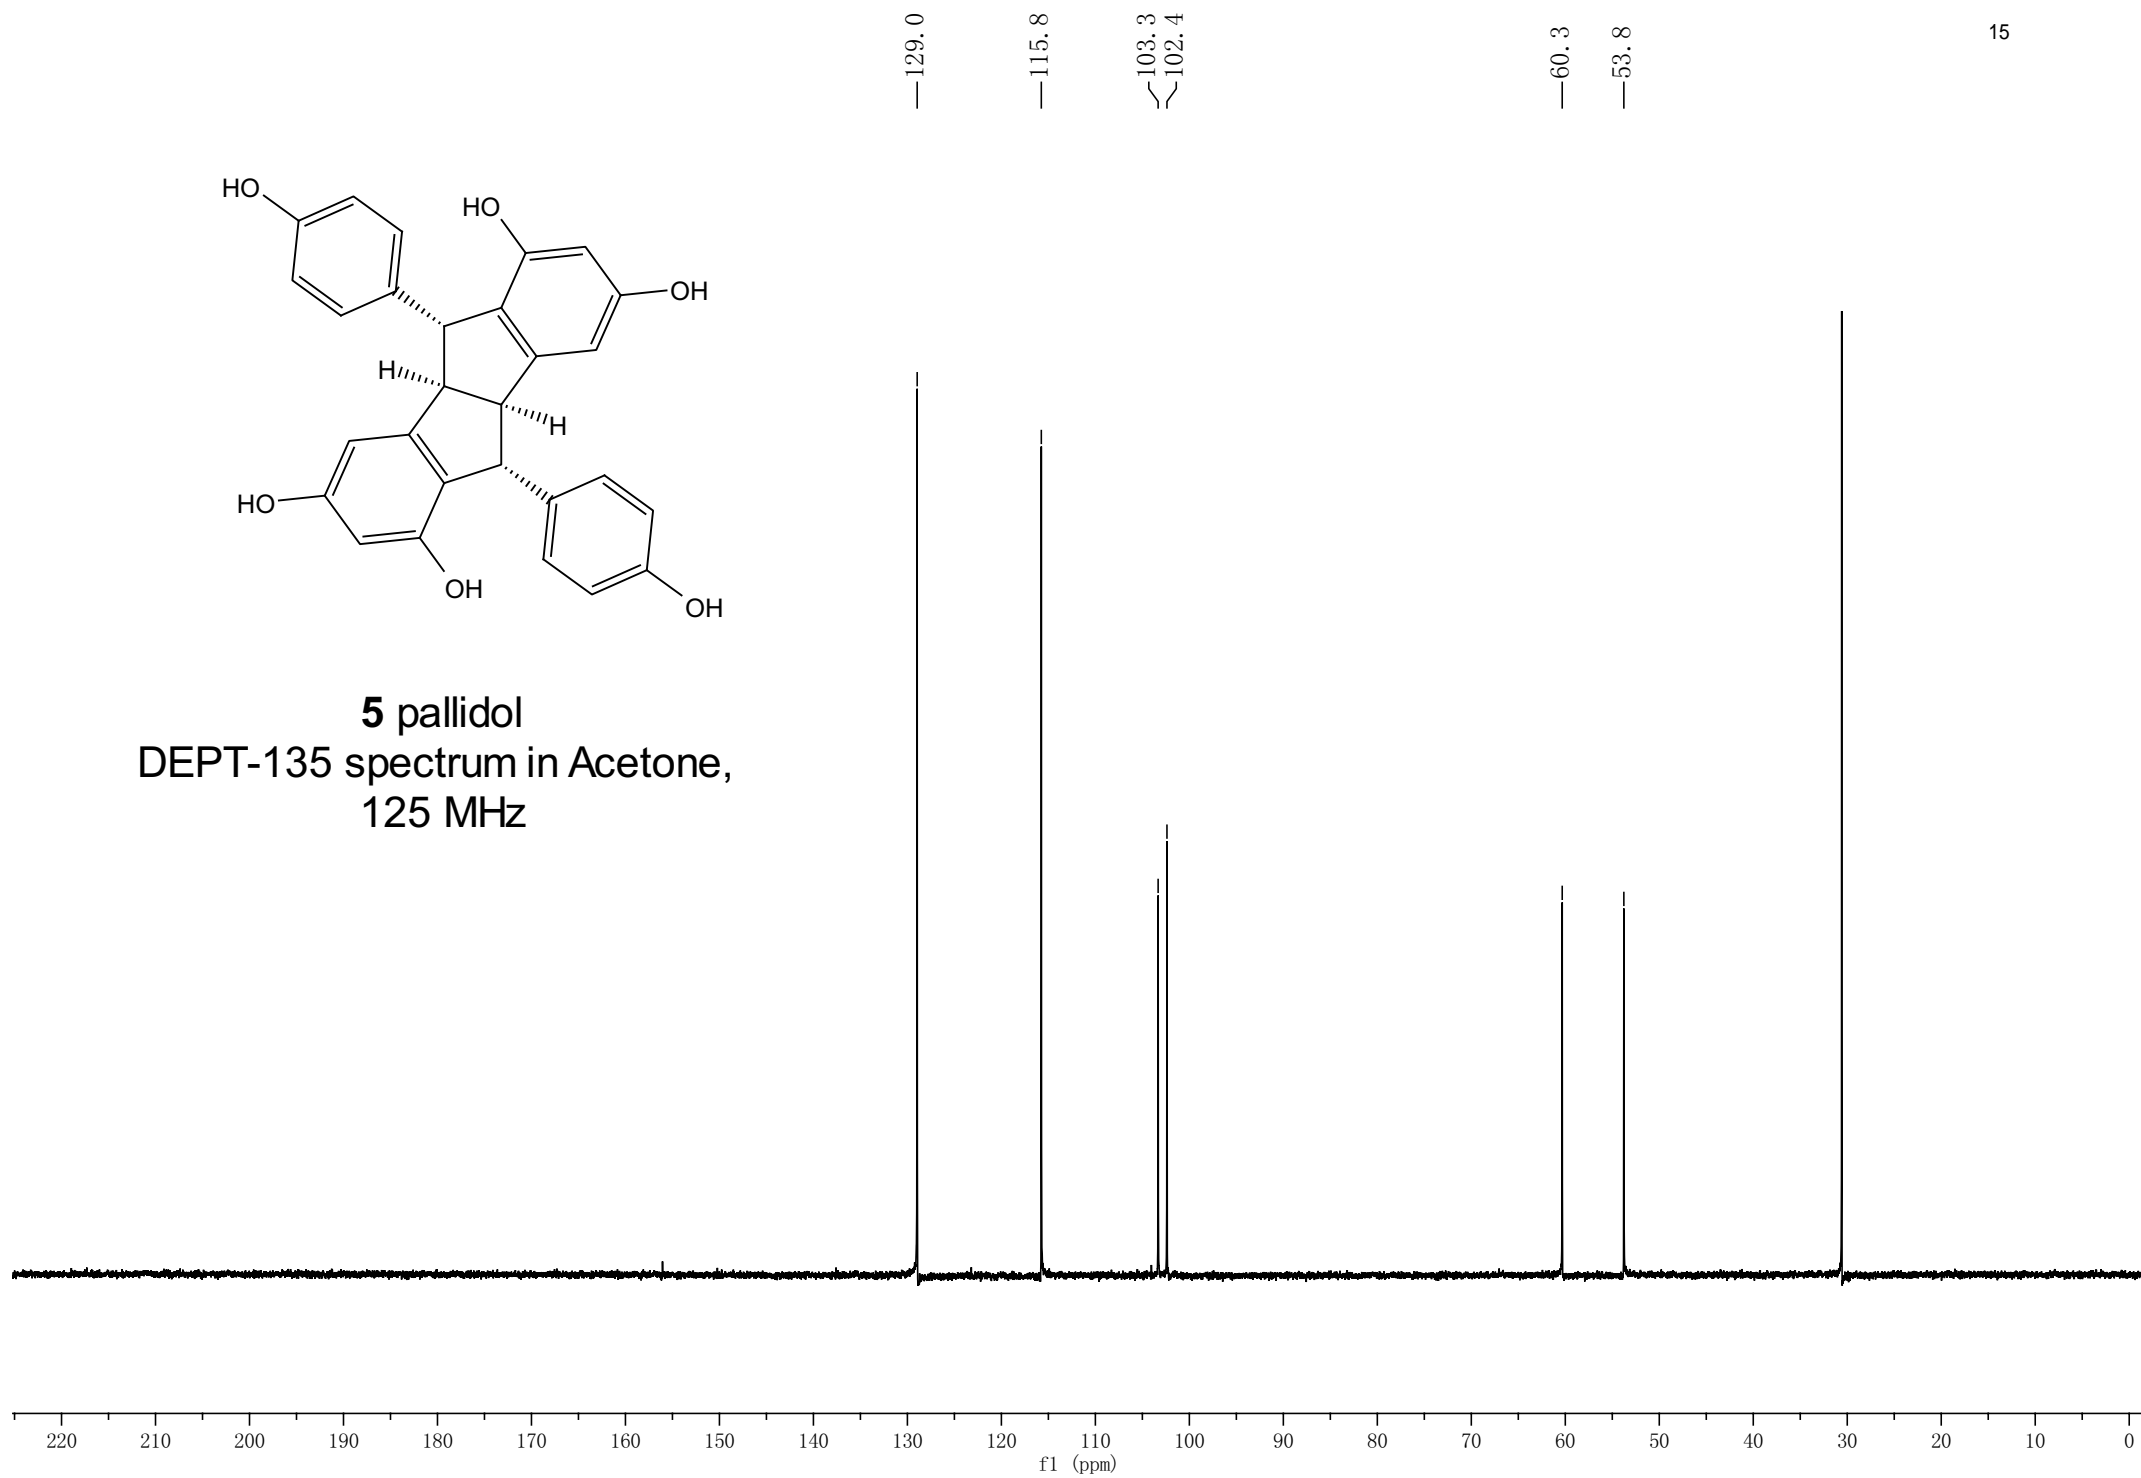

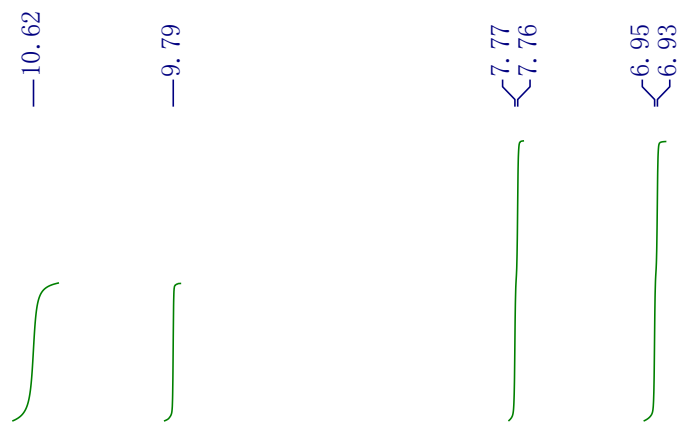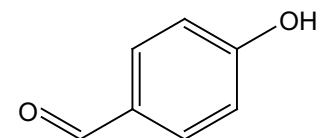

**6** 4-hydroxybenzaldehyde  
proton spectrum in DMSO, 500 MHz

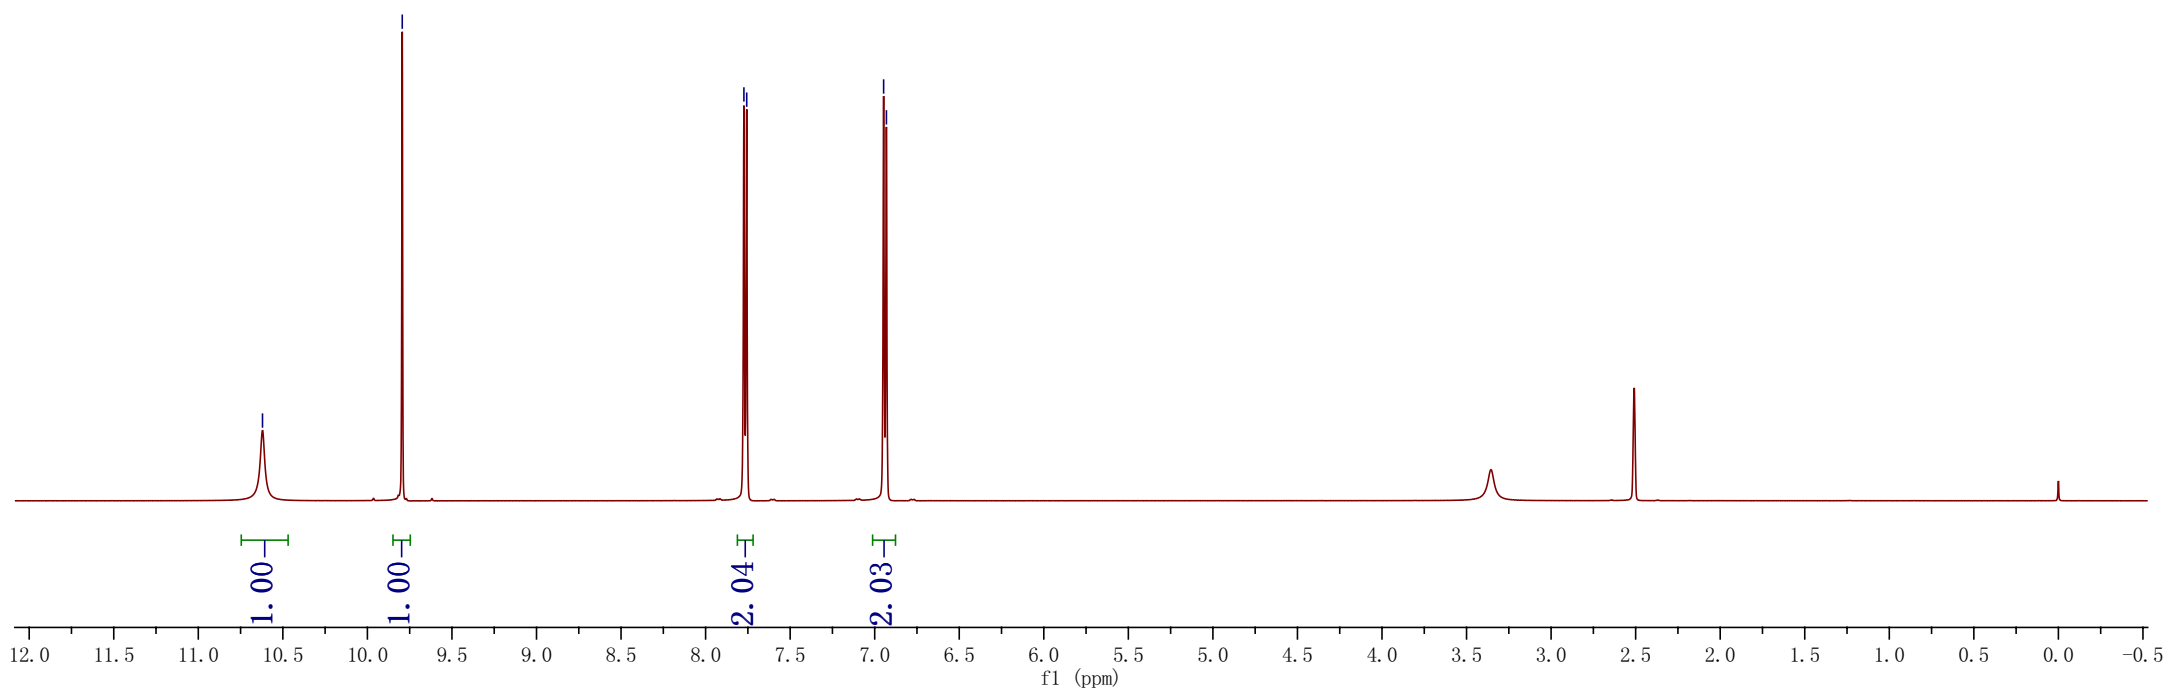



—190.91

—163.31

—132.06

—128.39

—115.81

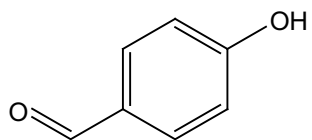

**6** 4-hydroxybenzylaldehyde  
carbon spectrum in DMSO, 125 MHz

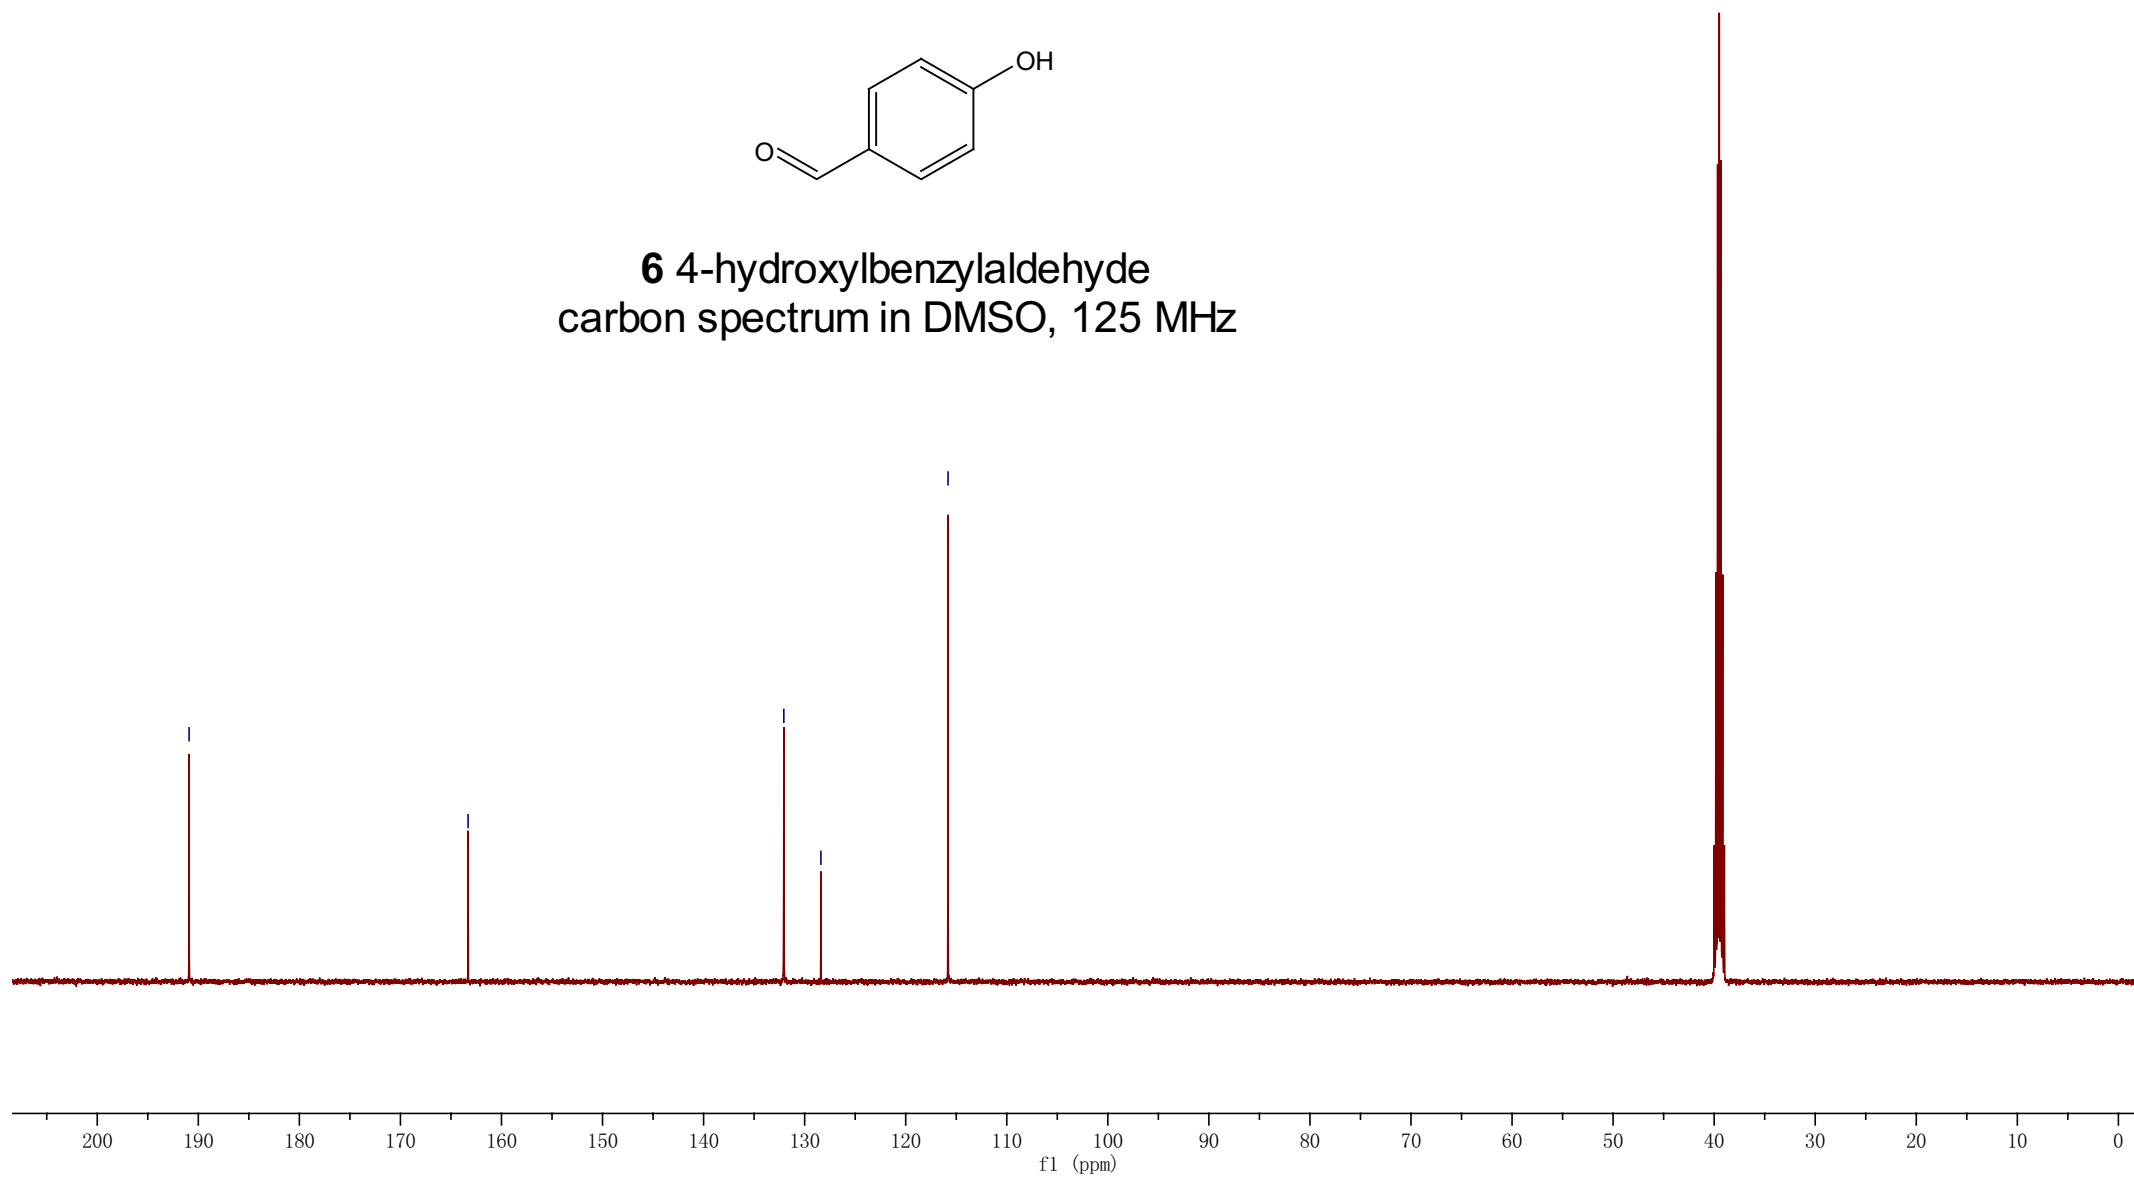

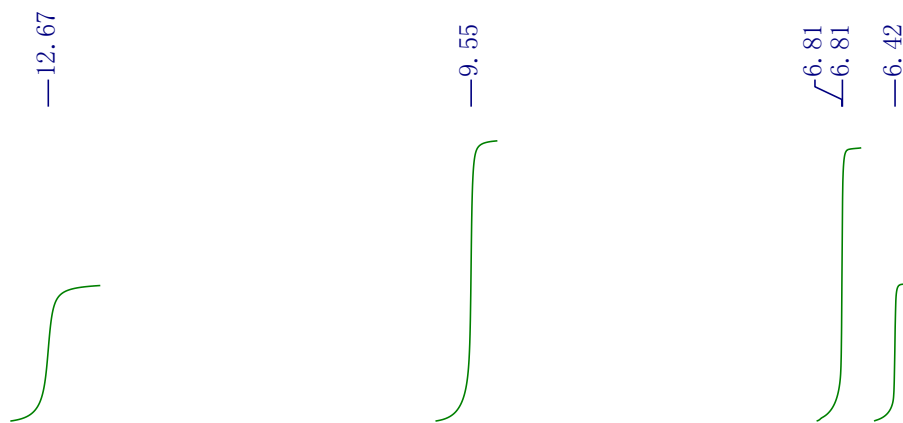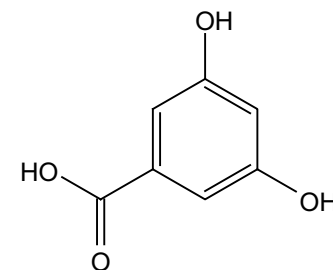

**7** 3,5-dihydroxybenzoic acid  
proton spectrum in DMSO, 500 MHz

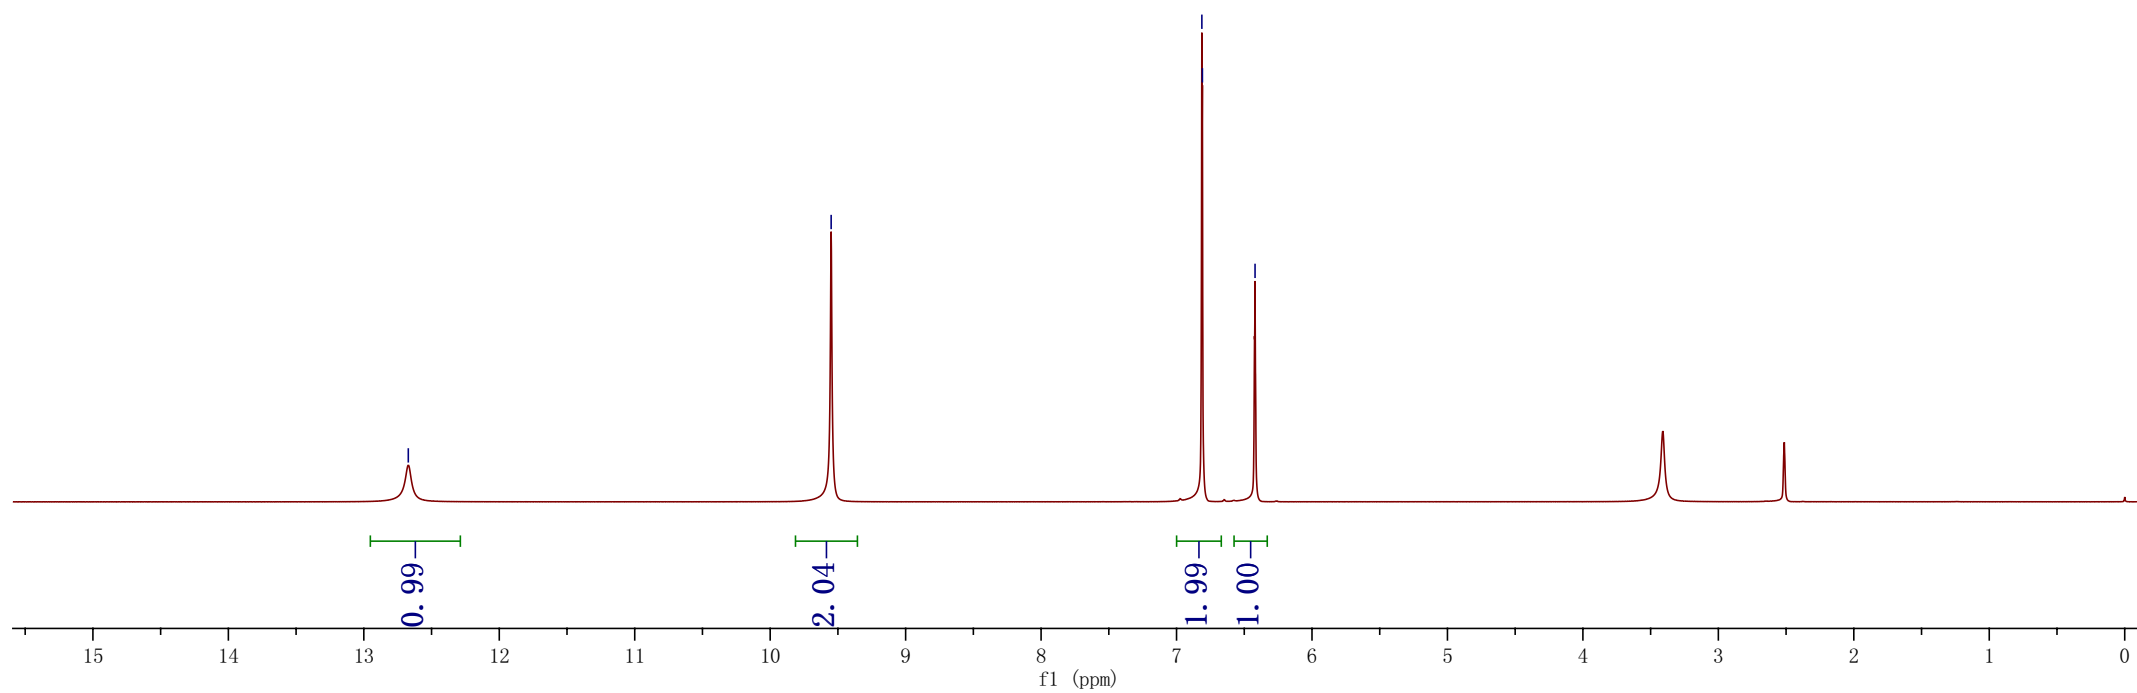

—167.32

—158.35

—132.46

—107.26  
—106.75

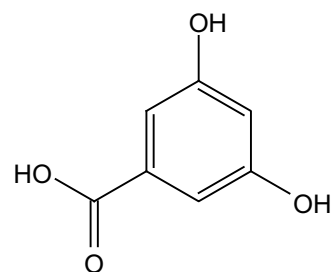

**7** 3,5-dihydroxybenzoic acid  
carbon spectrum in DMSO, 125 MHz

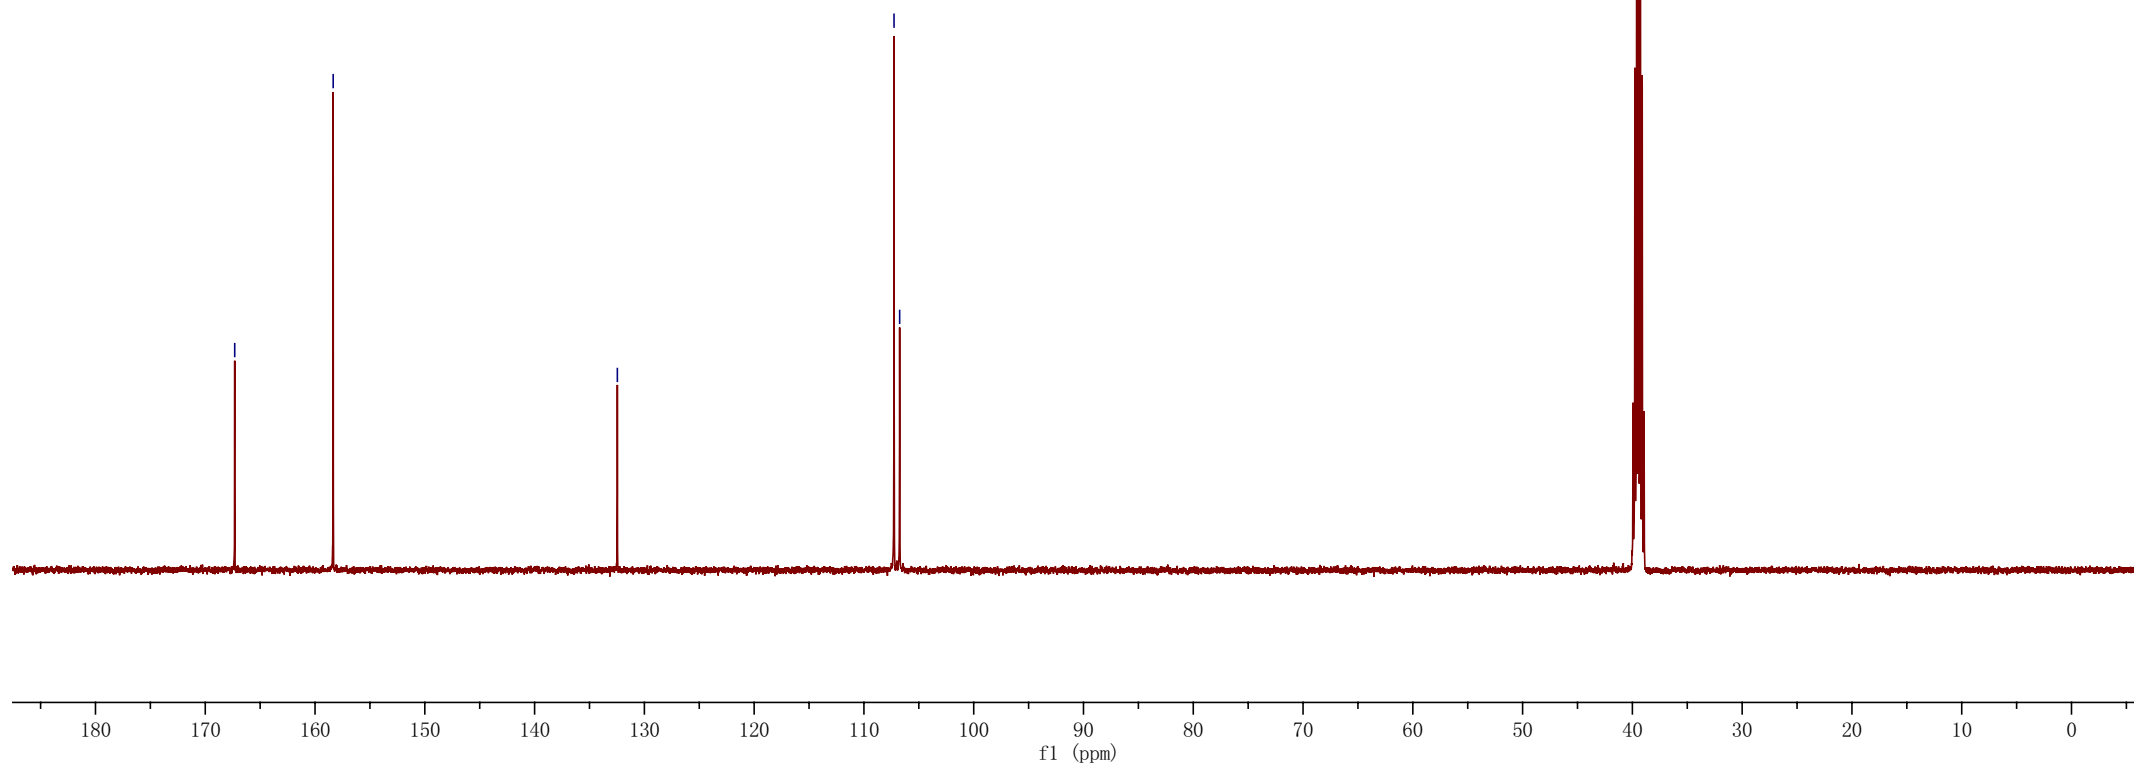

Supplement: c3ra43784a.pdf [file c3ra43784a.pdf]
